# Supplementary material for: Mn2+ activated Ca-α-SiAlON – broadband deep-red luminescence and sensitization by Eu2+, Yb2+ and Ce3+
Source: Royal Society of Chemistry journal article supplement (doi:10.1039/d1ma00036e), 2021-01-01
Supplement: d1ma00036e1.pdf [file d1ma00036e1.pdf]

## Supporting information

### **Mn<sup>2+</sup> activated Ca- $\alpha$ -SiAlON – Broadband deep-red luminescence and sensitization by Eu<sup>2+</sup>, Yb<sup>2+</sup> and Ce<sup>3+</sup>**

Atul D. Sontakke,<sup>a</sup> Arnoldus J. van Bunningen,<sup>a</sup> Sadakazu Wakui,<sup>a,b</sup> and Andries Meijerink<sup>a</sup>

<sup>a</sup> *Condensed Matter & Interfaces, Debye Institute for Nanomaterials Science, Utrecht University, Princetonplein 1, 3584 CC Utrecht, The Netherlands*

<sup>b</sup> *Nichia Corporation, 491 Oka, Kaminaka-Cho, Anan-Shi, Tokushima 774-8601, Japan*

#### **Contents:**

Figure S1: Normalized PL emission spectra of Mn<sup>2+</sup> (10 at.%) doped Ca- $\alpha$ -SiAlON samples obtained using fluoride and oxide doping precursors.

Figure S2: PLE spectra of Mn<sup>2+</sup> (10 at.%) doped Ca- $\alpha$ -SiAlON samples obtained using fluoride and oxide doping precursors.

Figure S3: PXRD patterns of Ca- $\alpha$ -SiAlON samples doped with 0 – 15 at.% Mn<sup>2+</sup> contents.

Figure S4: PLE spectra of Mn<sup>2+</sup> (1 – 15 at.%) doped Ca- $\alpha$ -SiAlON in semi-log scale. The charge transfer band (< 350 nm) exhibits maximum intensity for 5 at.% Mn<sup>2+</sup> contents, whereas the d-d transition bands (> 350 nm) exhibits maximum for 10 at.% Mn<sup>2+</sup>.

Figure S5: Mn<sup>2+</sup> PL decay curve in 1 at.% doped Ca- $\alpha$ -SiAlON and respective multi-exponential fit. The curve exhibits good fit with three exponential fitting. The slowest component exhibits decay lifetime of 2.1 ms.

Figure S6: Mn<sup>2+</sup> PL-PLE spectra at 4.2 K. The zero phonon line (ZPL) is weak and is estimated to be at around 593 nm. The PL-PLE crossing point also occurs at around 593 nm.

Figure S7: Temperature dependent PL spectra of Mn<sup>2+</sup> (10 at.%) doped Ca- $\alpha$ -SiAlON under 443 nm excitation.

Figure S8: Schematic configuration crossover model suggesting lower activation energy ( $E_a$ ) for red-shifted emission transitions.

Figure S9: 4.2 K PLE spectra of Mn<sup>2+</sup> (10 at.%) doped Ca- $\alpha$ -SiAlON monitoring at different emission regions. The PLE feature reveals prominent variation at 428 nm and 443 nm with respect to monitoring wavelength.

Figure S10: Figure S10: 4.2 K vibronic fine-structure of Mn<sup>2+</sup> orange-red PL observed in Ba s-phase and AlN (top). PXRD pattern of Ba s-phase and reference patterns (bottom).

Figure S11: Figure S11: PL-PLE spectra of Eu<sup>2+</sup> singly doped and Eu<sup>2+</sup>-Mn<sup>2+</sup> codoped Ba s-phase compounds (top). Eu<sup>2+</sup> PL decay curves in singly and codoped samples (bottom).

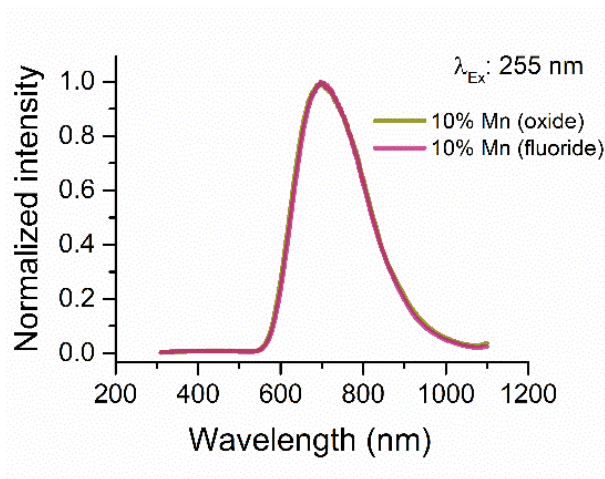

Figure S1: Normalized PL emission spectra of Mn<sup>2+</sup> (10 at.%) doped Ca- $\alpha$ -SiAlON samples obtained using fluoride and oxide doping precursors.

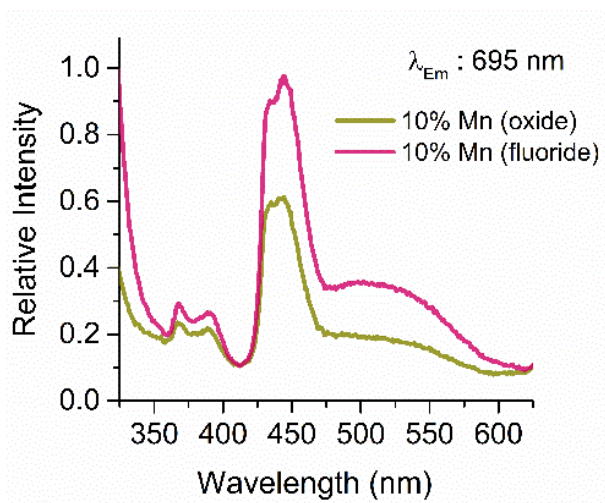

Figure S2: PLE spectra of Mn<sup>2+</sup> (10 at.%) doped Ca- $\alpha$ -SiAlON samples obtained using fluoride and oxide doping precursors.

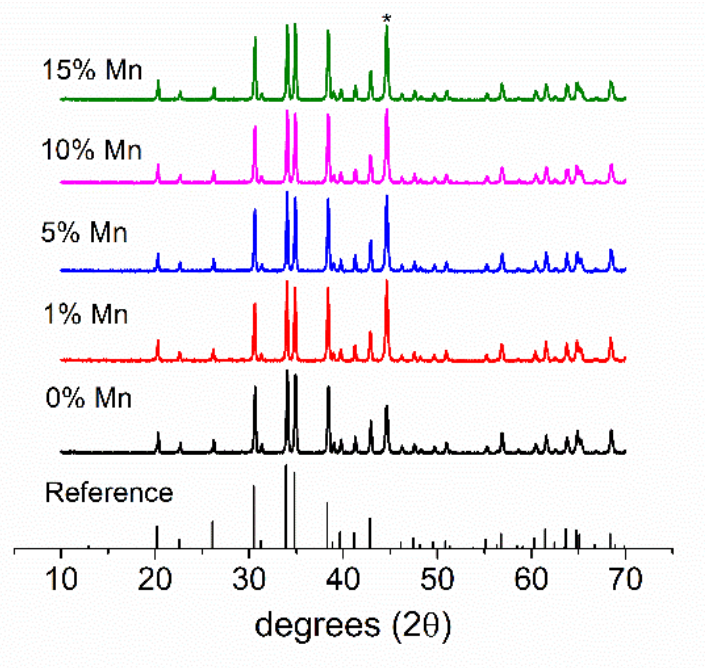

Figure S3: PXRD patterns of Ca- $\alpha$ -SiAlON samples doped with 0 – 15 at.% Mn<sup>2+</sup> contents. All sample holder reflections appear at about 39<sup>o</sup>, 45<sup>o</sup> and 65<sup>o</sup>.

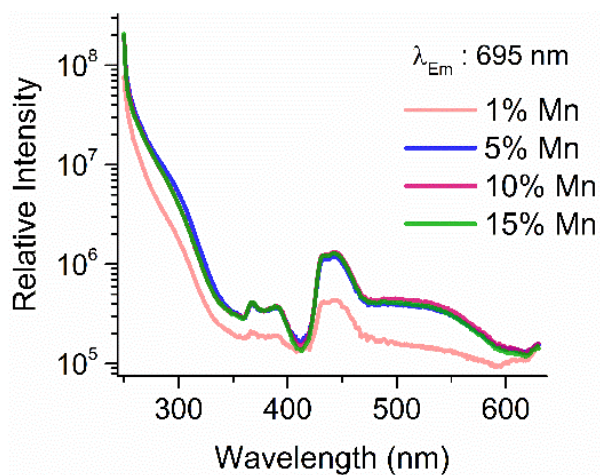

Figure S4: PLE spectra of Mn<sup>2+</sup> (1 – 15 at.%) doped Ca- $\alpha$ -SiAlON in semi-log scale. The charge transfer band (< 350 nm) exhibits maximum intensity for 5 at.% Mn<sup>2+</sup> contents, whereas the d-d transition bands (> 350 nm) exhibits maximum for 10 at.% Mn<sup>2+</sup>.

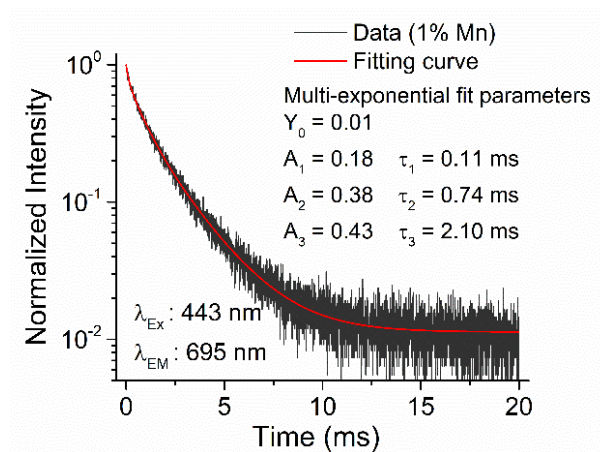

Figure S5:  $\text{Mn}^{2+}$  PL decay curve in 1 at.% doped Ca- $\alpha$ -SiAlON and respective multi-exponential fit. The curve exhibits good fit with three exponential fitting. The slowest component exhibits decay lifetime of 2.1 ms.

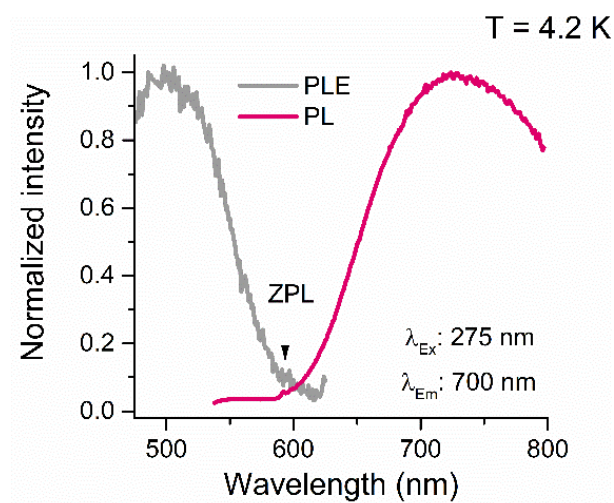

Figure S6:  $\text{Mn}^{2+}$  PL-PLE spectra at 4.2 K. The zero phonon line (ZPL) is weak and is estimated to be at around 593 nm. The PL-PLE crossing point also occurs at around 593 nm.

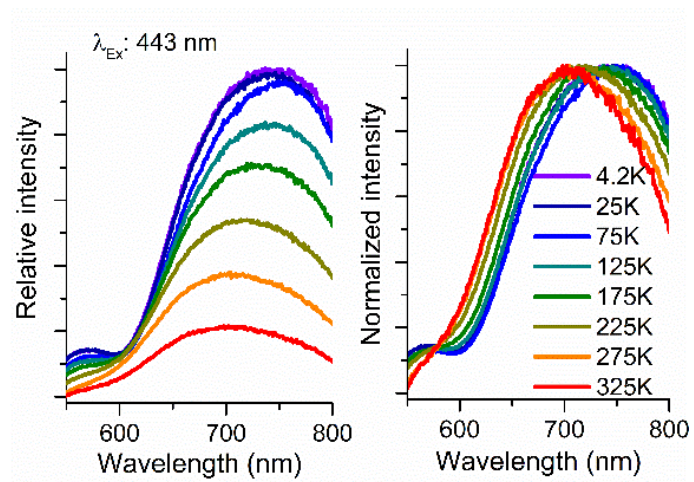

Figure S7: Temperature dependent PL spectra of  $\text{Mn}^{2+}$  (10 at.%) doped  $\text{Ca-}\alpha\text{-SiAlON}$  under 443 nm excitation.

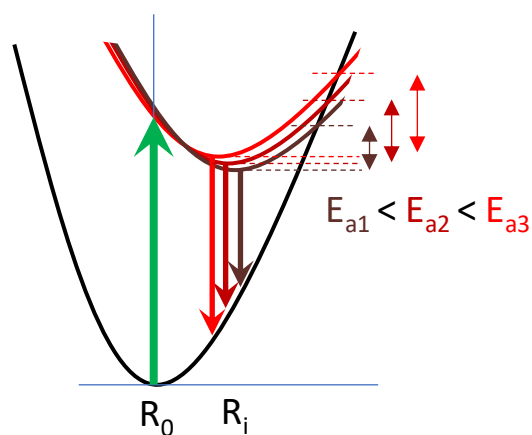

Figure S8: Schematic configuration crossover model suggesting lower activation energy ( $E_a$ ) for red-shifted emission transitions.

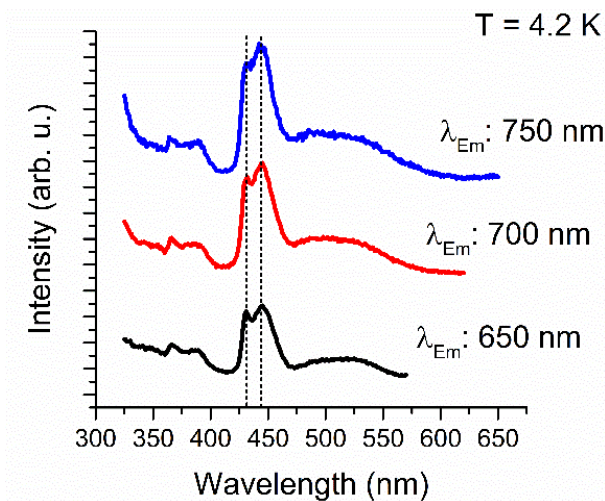

Figure S9: 4.2 K PLE spectra of  $\text{Mn}^{2+}$  (10 at.%) doped Ca- $\alpha$ -SiAlON monitoring at different emission regions. The PLE feature reveals prominent variation at 428 nm and 443 nm with respect to monitoring wavelength.

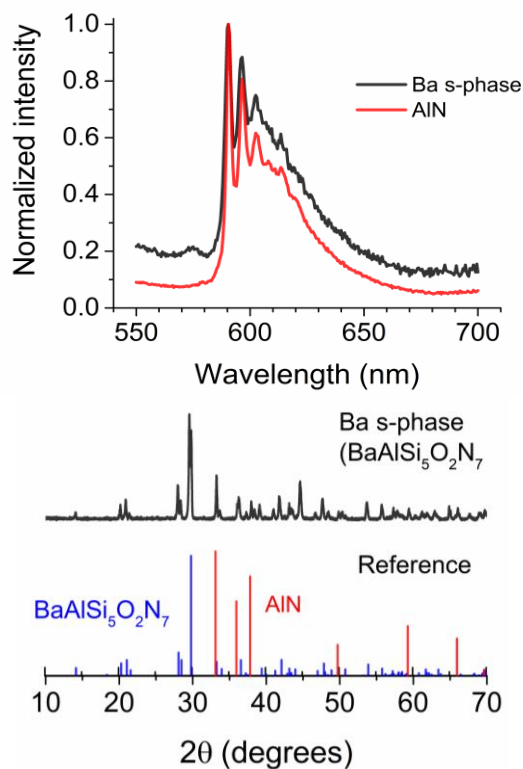

Figure S10: 4.2 K vibronic fine-structure of  $\text{Mn}^{2+}$  orange-red PL observed in Ba s-phase and AlN (top). PXR pattern of Ba s-phase and reference patterns (bottom). Al sample holder reflections appear at about  $39^\circ$ ,  $45^\circ$  and  $65^\circ$ .

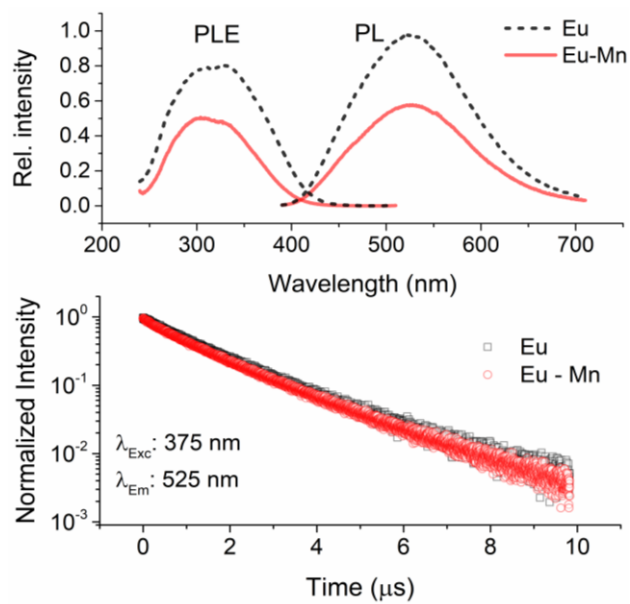

Figure S11: PL-PL spectra of  $\text{Eu}^{2+}$  singly doped and  $\text{Eu}^{2+}\text{-Mn}^{2+}$  codoped Ba s-phase compounds (top).  $\text{Eu}^{2+}$  PL decay curves in singly and codoped samples (bottom). The dopant concentration is 5 at% for  $\text{Eu}^{2+}$  as well as  $\text{Mn}^{2+}$ .
